# Supplementary material for: Repeated Leftover Serosurvey of SARS-CoV-2 IgG Antibodies in Greece, May to August 2020
Source: MDPI journal article supplement (doi:10.3390/vaccines9050504), 2021-05-13
Supplement: s1 [file s1]

## Supplementary Material

**Table 1:** S1 and S1 adjusted for Se & Sp in each age group for each sex separately.

|        | Month  | Age group | Positive | Total | S1     | 95% CI      | S1 adjusted for Se & Sp | 95% CI      |
|--------|--------|-----------|----------|-------|--------|-------------|-------------------------|-------------|
| Male   | May    | 0-29      | 1        | 526   | 0.19%  | 0.00% 0.56% | 0.00%                   | 0.00% 0.31% |
|        |        | 30-49     | 3        | 620   | 0.48%  | 0.00% 1.03% | 0.22%                   | 0.00% 0.87% |
|        |        | 50-69     | 1        | 697   | 0.14%  | 0.00% 0.42% | 0.00%                   | 0.00% 0.15% |
|        |        | 70+       | 3        | 585   | 0.51%  | 0.00% 1.09% | 0.25%                   | 0.00% 0.95% |
|        | June   | 0-29      | 1        | 688   | 0.15%  | 0.00% 0.43% | 0.00%                   | 0.00% 0.16% |
|        |        | 30-49     | 5        | 800   | 0.63 % | 0.08% 1.17% | 0.3944%                 | 0.00% 1.04% |
|        |        | 50-69     | 5        | 720   | 0.69%  | 0.09% 1.30% | 0.47%                   | 0.00% 1.20% |
|        |        | 70+       | 1        | 577   | 0.17%  | 0.00% 0.51% | 0.00%                   | 0.00% 0.25% |
|        | July   | 0-29      | 3        | 513   | 0.58%  | 0.00% 1.24% | 0.34%                   | 0.00% 1.13% |
|        |        | 30-49     | 5        | 538   | 0.93%  | 0.12% 1.74% | 0.75%                   | 0.00% 1.72% |
|        |        | 50-69     | 5        | 708   | 0.71%  | 0.09% 1.32% | 0.49%                   | 0.00% 1.22% |
|        |        | 70+       | 4        | 683   | 0.59%  | 0.01% 1.16% | 0.34%                   | 0.00% 1.02% |
|        | August | 0-29      | 2        | 267   | 0.75%  | 0.00% 1.78% | 0.54%                   | 0.00% 1.77% |
|        |        | 30-49     | 3        | 280   | 1.07%  | 0.00% 2.28% | 0.92%                   | 0.00% 2.36% |
|        |        | 50-69     | 1        | 240   | 0.42%  | 0.00% 1.23% | 0.14%                   | 0.00% 1.11% |
|        |        | 70+       | 1        | 187   | 0.53%  | 0.00% 1.58% | 0.28%                   | 0.00% 1.53% |
|        | Month  | Age Group | Positive | Total | S1     | 95% CI      | S1 adjusted for Se & Sp | 95% CI      |
| Female | May    | 0-29      | 6        | 655   | 0.92%  | 0.19% 1.65% | 0.74%                   | 0.00% 1.61% |
|        |        | 30-49     | 6        | 1037  | 0.58%  | 0.12% 1.04% | 0.33%                   | 0.00% 0.88% |
|        |        | 50-69     | 4        | 911   | 0.44%  | 0.01% 0.87% | 0.17%                   | 0.00% 0.68% |
|        |        | 70+       | 1        | 687   | 0.15%  | 0.00% 0.43% | 0.00%                   | 0.00% 0.16% |
|        | June   | 0-29      | 3        | 678   | 0.44%  | 0.00% 0.94% | 0.17%                   | 0.00% 0.77% |
|        |        | 30-49     | 5        | 1085  | 0.46%  | 0.06% 0.86% | 0.19%                   | 0.00% 0.67% |
|        |        | 50-69     | 1        | 905   | 0.11%  | 0.00% 0.33% | 0.00%                   | 0.00% 0.03% |
|        |        | 70+       | 2        | 682   | 0.29%  | 0.00% 0.70% | 0.00%                   | 0.00% 0.48% |
|        | July   | 0-29      | 3        | 708   | 0.42%  | 0.00% 0.90% | 0.15%                   | 0.00% 0.72% |
|        |        | 30-49     | 3        | 1107  | 0.27%  | 0.00% 0.58% | 0.00%                   | 0.00% 0.33% |
|        |        | 50-69     | 4        | 878   | 0.46%  | 0.01% 0.90% | 0.19%                   | 0.00% 0.72% |
|        |        | 70+       | 2        | 824   | 0.245% | 0.00% 0.58% | 0.00%                   | 0.00% 0.33% |
|        | August | 0-29      | 0        | 340   | 0.00%  | 0.00% 0.00% | 0.00%                   | 0.00% 0.00% |
|        |        | 30-49     | 3        | 490   | 0.61%  | 0.00% 1.30% | 0.37%                   | 0.00% 1.20% |
|        |        | 50-69     | 2        | 269   | 0.74%  | 0.00% 1.77% | 0.53%                   | 0.00% 1.76% |
|        |        | 70+       | 0        | 225   | 0.00%  | 0.00% 0.00% | 0.00%                   | 0.00% 0.00% |
